# Supplementary material
Source: publisher site journal article supplement (https://www.dovepress.com/article/248602)
Supplement: Supplementary file 1 [file get_supplementary_file.php]

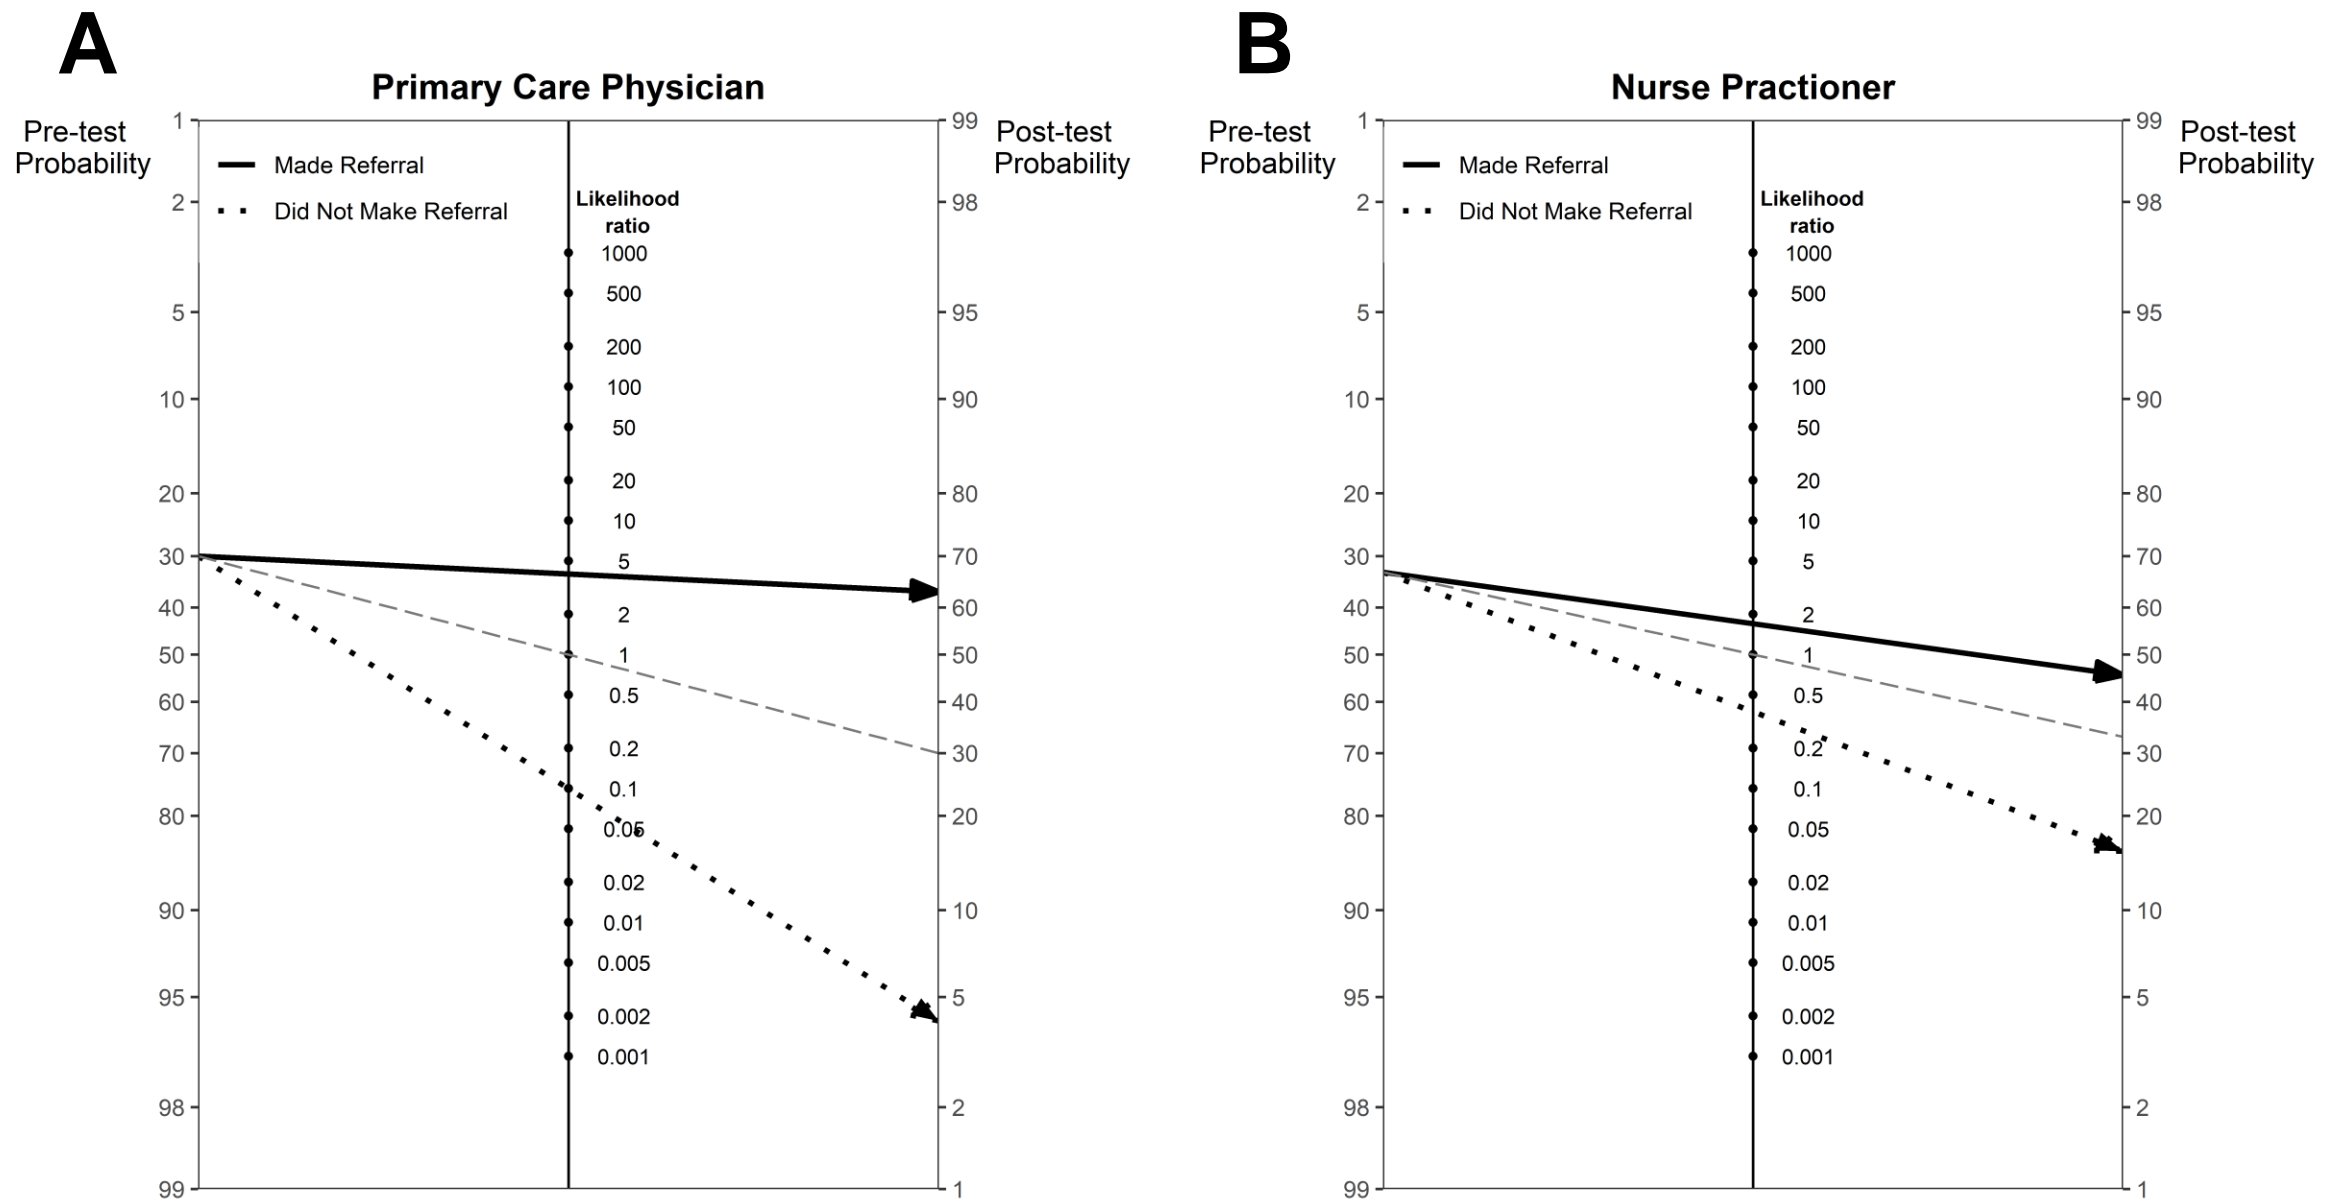

**Supplementary Figure 1: Fagan's nomogram.** (A) Spasticity prevalence was 30% in the cohort evaluated by the PCP and reference standard neurologist (pre-test probability; gray dashed line). The prevalence of spasticity increased to 63% among subjects determined to need a referral (black line) and decreased to 4% among subjects determined not to need a referral (dotted line; post-test probabilities). (B) Spasticity prevalence was 33% in the cohort evaluated by the NP and reference standard neurologist (pre-test probability; gray dashed line). The prevalence of spasticity increased to 46% among subjects determined to need a referral (black line) and decreased to 16% among subjects determined not to need a referral (dotted line; post-test probabilities).
